# Supplementary material for: Enhanced hepatic-targeted delivery via oral administration using nanoliposomes functionalized with a novel DSPE–PEG–cholic acid conjugate
Source: Royal Society of Chemistry journal article supplement (doi:10.1039/c5ra28018d), 2016-01-01
Supplement: c5ra28018d1.pdf [file c5ra28018d1.pdf]

### Electronic Supplementary Information

Enhanced hepatic targeted delivery via oral administration using nanoliposomes  
functionalized with novel DSPE-PEG-cholic acid conjugate

Ying Li, Chunyan Zhu\*

Institute of Medicinal Plant Development, Chinese Academy of Medical Sciences and  
Peking Union Medical College, Beijing 100193, China, Wayne State University, Detroit, MI  
48202, USA

\*Corresponding author:

Tel./fax: +86 10 57833276. E-mail address: [cyzhu@implad.ac.cn](mailto:cyzhu@implad.ac.cn)

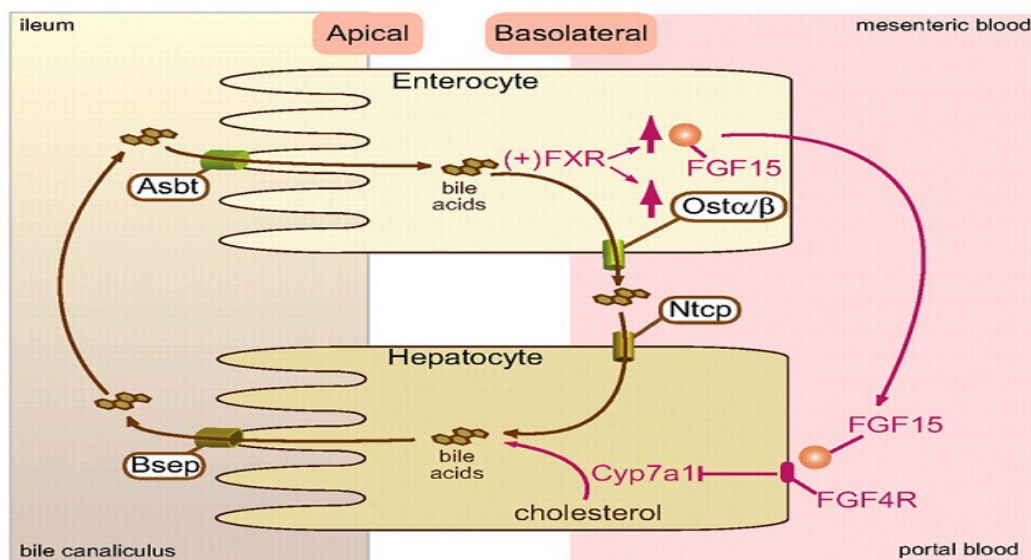

**Fig. S1** The vivo fate of cholic acid after oral administration

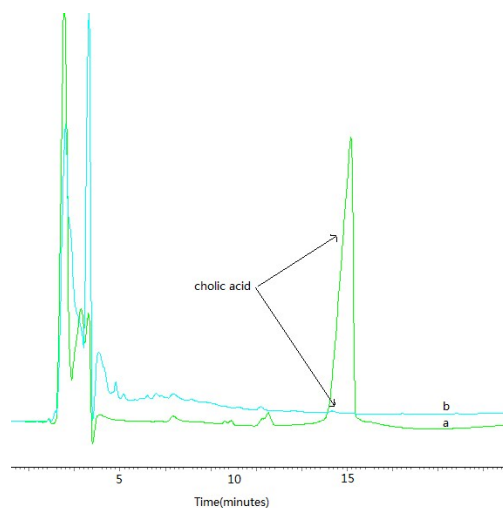

**Fig. S2** HPLC of cholic acid and DSPE-PEG-cholic acid. a:cholic acid,b: DSPE-PEG-cholic acid.

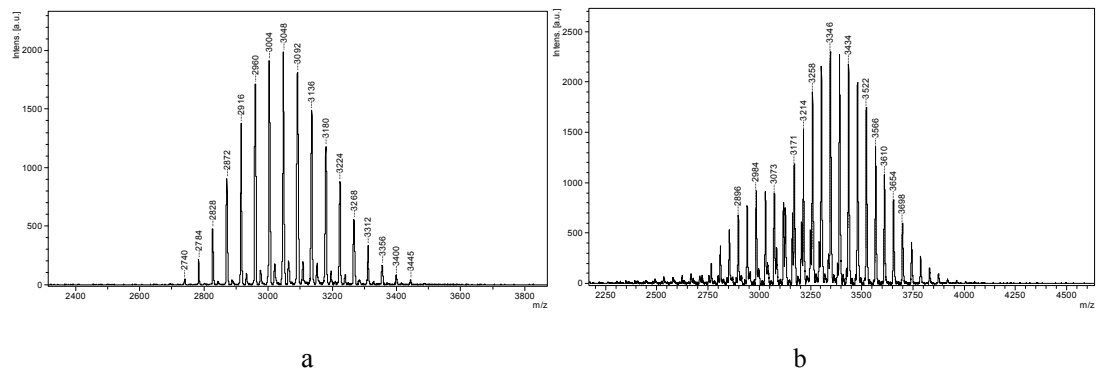

**Fig. S3** MALDI-TOF MS spectra of DSPE-PEG-cholic acid. a:cholic acid,b: DSPE-PEG-cholic acid.

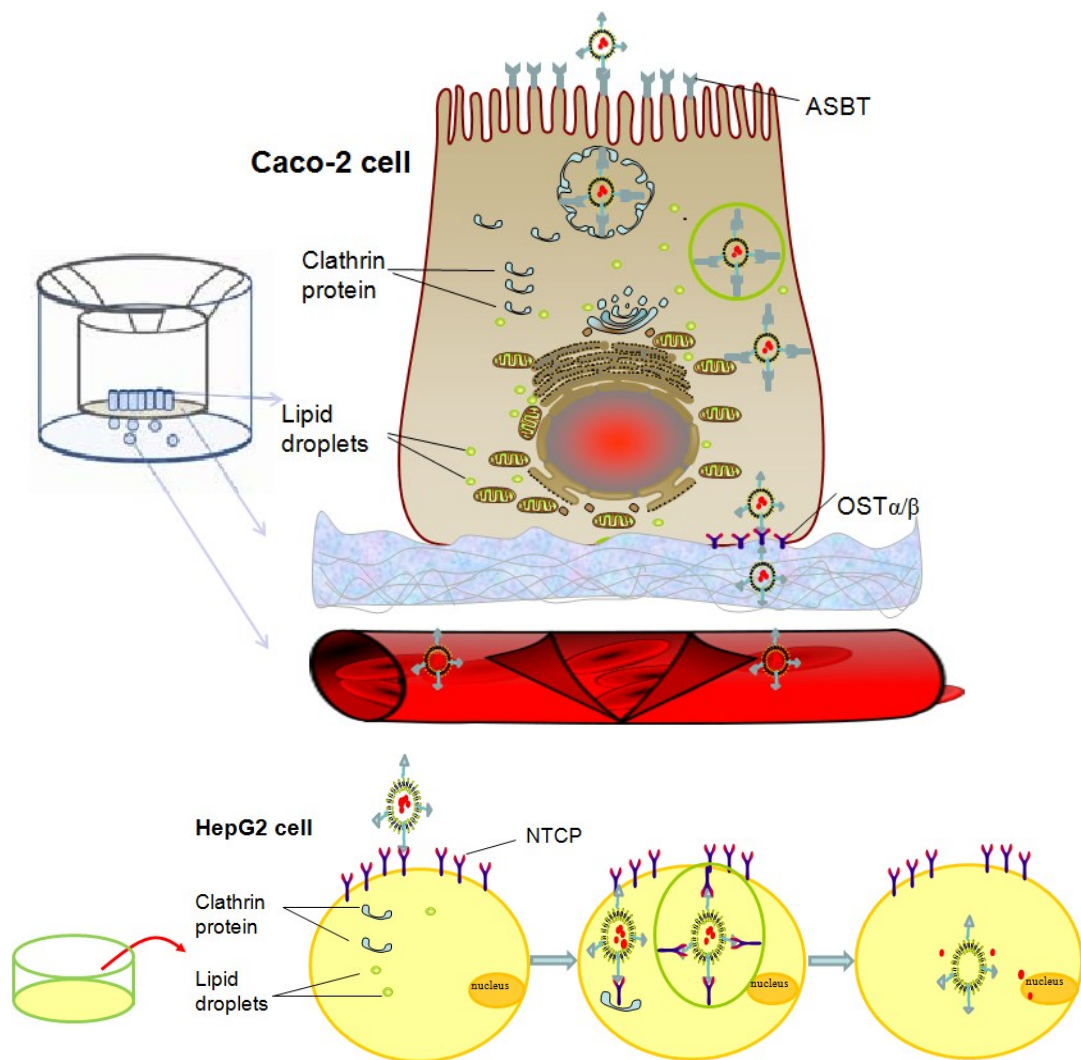

**Fig. S4** A.Schematic diagram of the transcellular process CA-LPs on Caco-2 monolayer; B. Schematic diagram of the CA-LPs targeting to NTCP and the intracellular trafficking.

**Table S1** Characteristics of silybin-loaded functional nanoliposomes and the control(n=3)

| Characterizations | Particle size (nm) | PDI          | Zeta potential (mV) | Encapsulation ratio(%) | Loading efficiency(%) |
|-------------------|--------------------|--------------|---------------------|------------------------|-----------------------|
| LPS-silybin       | 96.07±1.14         | 0.207±0.0135 | -11.67±1.25         | 99.93±0.0049           | 7.46±0.65             |
| CA-LPs-silybin    | 94.65±0.73         | 0.179±0.007  | -4.02±0.62          | 99.86±0.0049           | 6.56±0.72             |

**Table S2** The percent of free drug and drug loaded in nanoliposomes among all drugs in basolateral chamber(n=3)

| groups         | % free drug in basolateral chamber | % drug loaded in nanoliposomes in basolateral chamber |
|----------------|------------------------------------|-------------------------------------------------------|
| LPS-silybin    | 10.95±4.01                         | 89.05±4.01                                            |
| CA-LPs-silybin | 3.17±1.29                          | 96.83±1.29                                            |

**Table S3** Pharmacokinetic parameters in blood silybin after oral administration of free drug, LPS-silybin or CA-LPs-silybin to rats; mean F S.E. (n=6)

| Parameter                        | Free drug    | LPS-silybin   | CA-LPs-silybin |
|----------------------------------|--------------|---------------|----------------|
| C <sub>max</sub> (ug/mL)         | 0.12±0.014   | 0.12±0.019    | 0.16±0.019     |
| T <sub>max</sub> (min)           | 30±6.12      | 30±18.37      | 30±17.54       |
| AUC <sub>0-240</sub> (µg/ml*min) | 21.40±1.15   | #23.39±3.48   | ##28.29±3.86   |
| MRT(min)                         | 380.18±74.84 | 732.39±432.32 | 546.08±93.69   |
| F <sub>r</sub> (%)               | -            | 109.30        | 132.18         |

Fr: relative bioavailability=(AUC<sub>0-240</sub>(Test)×100)/(AUC<sub>0-240</sub>(silybin)).Comparative Pharmacokinetics profile in blood of silybin solution, LPS-silybin and CA-LPs-silybin 4h post administration (mean±S.E., n=6, \*\*p<0.01 between silybin solution and other formulations, # P<0.05 between LPS-silybin and CA-LPs-silybin).

**Table S4** Pharmacokinetic parameters in liver silybin after oral administration of free drug, LPS-silybin or CA-LPs-silybin to rats; mean F S.E.(n=6)

| Parameter               | Free drug        | LPS-silybin     | CA-LPs-silybin   |
|-------------------------|------------------|-----------------|------------------|
| C <sub>max</sub> (ng/g) | 352.43±69.01     | 1238.506±270.48 | 3874.399±1283.71 |
| T <sub>max</sub> (min)  | 30±0             | 30±0            | 30±0             |
| AUC <sub>0-</sub>       | 58379.33±7836.90 |                 |                  |

|                    |                 |                    |                   |
|--------------------|-----------------|--------------------|-------------------|
| 240(ng/g*min)      |                 | 125867.7 ± 22975.6 | 253823 ± 24135.35 |
| MRT(min)           | 455.89 ± 121.76 | 132.09 ± 33.81     | 107.34 ± 21.07    |
| F <sub>r</sub> (%) | -               | 215.60             | 434.78            |

Fr: relative bioavailability=(AUC<sub>0-240</sub>(Test)×100)/(AUC<sub>0-240</sub>(silybin)).Comparative Pharmacokinetics profile in blood of silybin solution, LPS-silybin and CA-LPS-silybin 4h post administration (mean±S.E., n=6, \*\**p*<0.01 between silybin solution and other formulations, # # *P*<0.01 between LPS-silybin and CA-LPS-silybin).
